# Supplementary material for: Patterns of Abdominal Fat Distribution
Source: Oxford University Press journal article supplement (doi:10.2337/dc08-1359), 2008-12-16
Supplement: dc08-1359_online_appendix.doc [file dc08-1359_online_appendix.doc]

**METHODS**

##### **Study sample:** The study sample consisted of women and men enrolled in the community-based Framingham Heart Study Offspring and Third Generation cohorts who participated in a Multi-Detector Computed Tomography (MDCT) sub-study. Originating in 1948 with the original cohort, the Framingham Heart study began enrollment of the offspring (and spouses of the offspring) in 1971 (n=5124). Subsequently, the children of the Offspring cohort were enrolled in the Third Generation cohort (n=4095) between 2002 and 2005. Selection criteria and study design have been previously described.1;2 All participants underwent a standard clinical visit including a physician interview and physical exam, and phlebotomy for laboratory analyses in a fasting state.

As part of the MDCT sub-study, 3529 participants (2111 Third Generation, 1418 Offspring participants) underwent MDCT scanning of the chest and abdomen for assessment of coronary and aortic calcium between June 2002 and April 2005. Inclusion criteria has been previously described.3 Of the total of 3529 subjects imaged, 3371 had interpretable CT measures, and 3348 had both SAT and VAT measured, resulting in a total sample size of 3348 individuals for the present investigation.

The study protocol was approved by the institutional review boards of the Boston University Medical Center and Massachusetts General Hospital. All subjects provided written informed consent. The authors had full access to the data and take responsibility for its integrity. All authors have read and agree to the manuscript as written.

### Abdominal adipose tissue imaging and volumetric measurements: Participants underwent eight-slice MDCT scanning of the abdomen in a supine position (LightSpeed Ultra, General Electric, Milwaukee, WI). Twenty-five contiguous five mm thick slices (120 kVp, 400 mA, gantry rotation time 500 ms, table feed 3:1) were acquired covering 125 mm above the level of S1.

Subcutaneous and visceral adipose tissue volumes (SAT and VAT) were assessed (Aquarius 3D Workstation, TeraRecon Inc., San Mateo, CA) by manually tracing the abdominal muscular wall separating the subcutaneous from the deeper visceral compartment as previously described.4 Briefly, an image display window of -195 to -45 Hounsfield Units (HU) was applied and centered at -120 HU. The reader manually traced the abdominal muscular wall which separates the visceral from the subcutaneous fat depots. Inter-class correlations for inter-reader comparisons were 0.997 for SAT and 0.992 for VAT; correlations for intra-reader comparisons were similarly high.4

### Risk Factor Assessment: BMI was calculated by weight (kilograms) divided by the square of height (meters) and waist circumference was measured to the nearest 0.25 inch at the level of the umbilicus. Fasting morning plasma samples were obtained for measurement of fasting plasma glucose (FPG), total and HDL cholesterol, and triglycerides. Impaired fasting glucose (IFG) was defined as FPG 100-125 mg/dL in absence of diabetes treatment. Diabetes was defined as a FPG ≥ 126 mg/dL or treatment with a hypoglycemic agent. Hypertension was defined as treatment with an anti-hypertensive or systolic blood pressure (SBP) ≥ 140 mm Hg and/or diastolic blood pressure (DBP) ≥ 90 mm Hg. Metabolic syndrome was defined by modified ATP III criteria.5 Cardiovascular disease (CVD) was defined as myocardial infarction, coronary insufficiency, angina pectoris, atherothrombotic stroke, or intermittent claudication.

### Statistical Analysis: A healthy referent sample was created by hierarchical exclusion of BMI ≥ 30 kg/m2 (n=920); presence of hypertension, triglycerides ≥ 150 mg/dl or lipid treatment, low HDL cholesterol, IFG, or diabetes (n=1542); prevalent CVD (n=4); current tobacco smoking (n=111); BMI < 18.5 kg/m2 (n=13); or missing covariates (n=2), resulting in 285 men and 471 women. Sex-specific 90th percentile cut-points from this healthy sample were chosen to define the prevalence of high SAT and VAT in the overall sample. Sex-specific prevalence of high SAT or high VAT were determined within age categories (35-44, 45-54, 55-64, 65-74, and 75-84). Prevalence of high SAT or high VAT was then analyzed within categories of BMI (<25, 25-29.9, and 30+) and WC (high or normal: < 88cm in women and <102 cm in men). To explore prevalence of metabolic syndrome and risk factors within discordant categories of SAT and VAT, we separated the sample into four categories (SAT and VAT below the 90th percentile, high SAT/ VAT below the 90th percentile, SAT below the 90th percentile/ high VAT, and high SAT/high VAT) with high being defined as >90th percentileof SAT or VAT as defined by the healthy referent sample. Significance of differences across the four categories and between the discordant categories (high SAT/low fat and low SAT/high VAT categories) were assessed by sex-specific age-adjusted logistic regression for prevalences and analysis of covariance for continuous p-values.

In secondary analyses, we created a lean healthy referent group by excluding all individuals in the healthy referent group that were overweight (BMI >=25 kg/m2), which resulted in a sample size of 133 men and 332 women.

SAS version 8.0 was used to perform all computations; a two-tailed p-value <0.05 was considered significant.

**REFERENCE LIST**

1. Dawber T.R., Kannel W.B., Lyell L.P. An approach to longitudinal studies in a community: the Framingham Heart Study. *Ann NY Acad Sci*. 1963;107:539-556.

2. Splansky GL, Corey D, Yang Q, Atwood LD, Cupples LA, Benjamin EJ, D'Agostino RB, Sr., Fox CS, Larson MG, Murabito JM, O'donnell CJ, Vasan RS, Wolf PA, Levy D. The Third Generation Cohort of the National Heart, Lung, and Blood Institute's Framingham Heart Study: Design, Recruitment, and Initial Examination
1. *Am J Epidemiol*. 2007;165:1328-1335.

3. Fox CS, Massaro JM, Hoffmann U, Pou KM, Maurovich-Horvat P, Liu CY, Vasan RS, Murabito JM, Meigs JB, Cupples LA, D'Agostino RB, Sr., O'donnell CJ. Abdominal visceral and subcutaneous adipose tissue compartments: association with metabolic risk factors in the Framingham Heart Study. *Circulation*. 2007;116:39-48.

4. Maurovich-Horvat P, Massaro J, Fox CS, Moselewski F, O'donnell CJ, Hoffmann U. Comparison of anthropometric, area- and volume-based assessment of abdominal subcutaneous and visceral adipose tissue volumes using multi-detector computed tomography. *Int J Obes (Lond)*. 2006.

5. Executive Summary of The Third Report of The National Cholesterol Education Program (NCEP) Expert Panel on Detection, Evaluation, And Treatment of High Blood Cholesterol In Adults (Adult Treatment Panel III). *JAMA*. 2001;285:2486-2497.

**Table A1: SAT and VAT percentiles within age groups in men and women**

|  | SAT, cm3 | | | | | | | | VAT, cm3 | | | | | | |
| --- | --- | --- | --- | --- | --- | --- | --- | --- | --- | --- | --- | --- | --- | --- | --- |
|  | N | 5th | 10th | 25th | 50th | 75th | 90th | 95th | 5th | 10th | 25th | 50th | 75th | 90th | 95th |
| Men |  |  |  |  |  |  |  |  |  |  |  |  |  |  |  |
| 35-44 | 589 | 877 | 1187 | 1735 | 2216 | 3097 | 4296 | 5164 | 597 | 837 | 1239 | 1750 | 2350 | 2975 | 3307 |
| 45-54 | 533 | 1107 | 1430 | 1855 | 2498 | 3210 | 4350 | 5184 | 762 | 1054 | 1499 | 2117 | 2691 | 3420 | 3742 |
| 55-64 | 301 | 1263 | 1553 | 1986 | 2616 | 3446 | 4387 | 5096 | 955 | 1334 | 1850 | 2503 | 3215 | 3870 | 4281 |
| 65-74 | 205 | 1354 | 1578 | 1896 | 2467 | 3384 | 4171 | 4577 | 1342 | 1581 | 2104 | 2793 | 3663 | 4439 | 4755 |
| 75-84 | 97 | 867 | 1204 | 1766 | 2273 | 2678 | 3641 | 4095 | 885 | 1376 | 2108 | 2630 | 3756 | 4577 | 4944 |
| Women |  |  |  |  |  |  |  |  |  |  |  |  |  |  |  |
| 35-44 | 387 | 905 | 1185 | 1725 | 2453 | 3601 | 4955 | 5732 | 322 | 361 | 507 | 769 | 1278 | 1827 | 2238 |
| 45-54 | 531 | 1110 | 1315 | 1987 | 2847 | 4235 | 5481 | 6367 | 356 | 426 | 606 | 1062 | 1677 | 2434 | 2818 |
| 55-64 | 367 | 1490 | 1849 | 2398 | 3299 | 4404 | 5583 | 6116 | 529 | 633 | 905 | 1474 | 2001 | 2700 | 3040 |
| 65-74 | 216 | 1632 | 1943 | 2423 | 3122 | 4055 | 5212 | 5909 | 696 | 837 | 1220 | 1736 | 2373 | 3122 | 3470 |
| 75-84 | 101 | 894 | 1438 | 2094 | 2703 | 3532 | 4688 | 4875 | 545 | 726 | 1129 | 1568 | 2278 | 2931 | 3421 |

*n=21 individuals excluded from the overall sample who were not within these designated age range categories
